# Supplementary material for: Effects of seat pan and pelvis angles on the occupant response in a reclined position during a frontal crash
Source: PLOS journal article supplement (doi:10.1371/journal.pone.0257292), 2021-09-20
Supplement: S2 (10.1371/journal.pone.0257292.s002) [file journal.pone.0257292.s002]

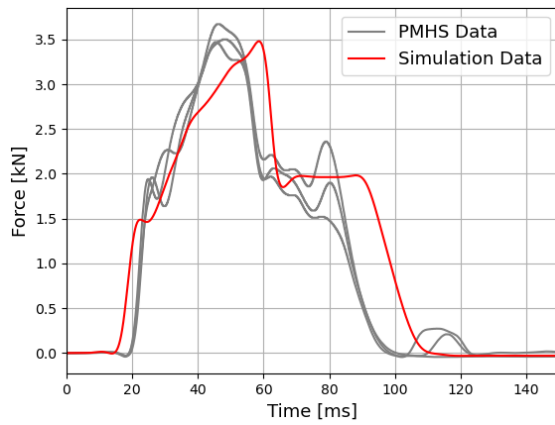

**A: Upper shoulder belt forces**

Correlation Method Score (CORA) : 0.914

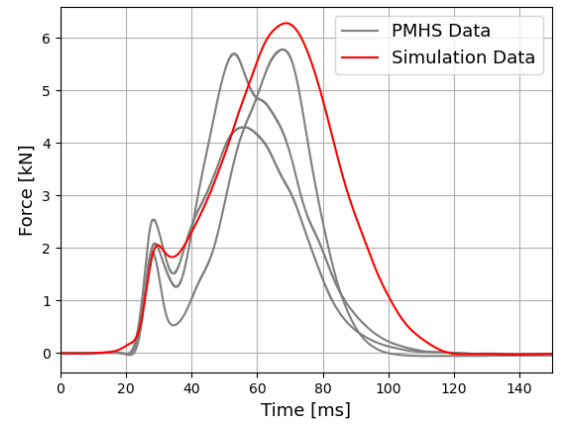

**B: Outboard lap belt forces**

Correlation Method Score (CORA) : 0.809

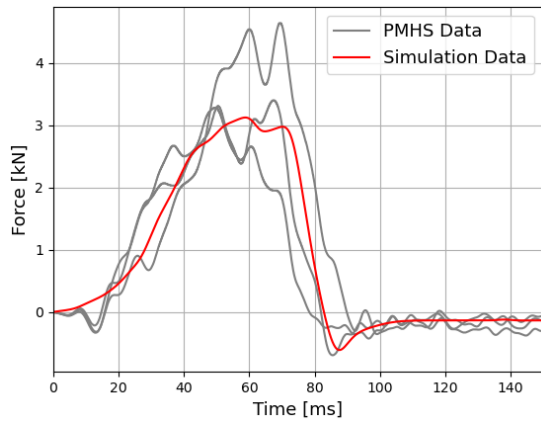

**C: Seatpan forces in X-direction**

Correlation Method Score (CORA) : 0.982

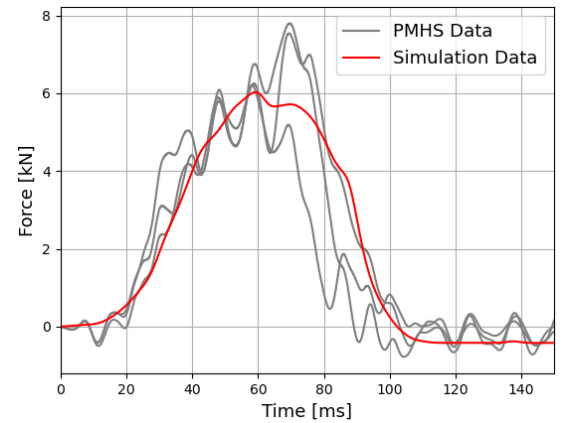

**D: Seatpan forces in Z-direction**

Correlation Method Score (CORA) : 0.940

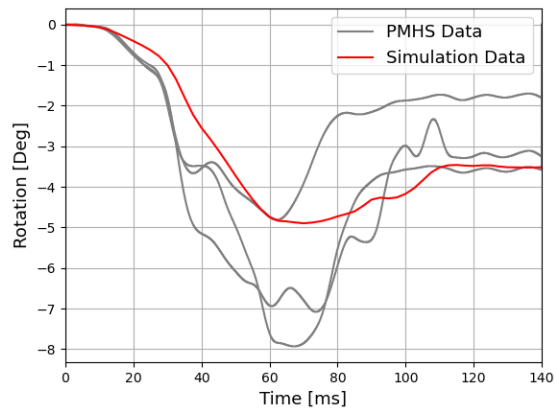

**E: Seatpan rotation around the Y-axis**

Correlation Method Score (CORA) : 0.839

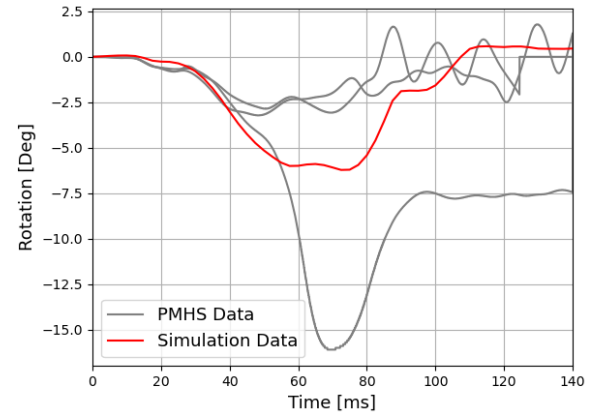

**F: Anti submarining guards rotation around the Y-axis**

Correlation Method Score (CORA) : 0.896

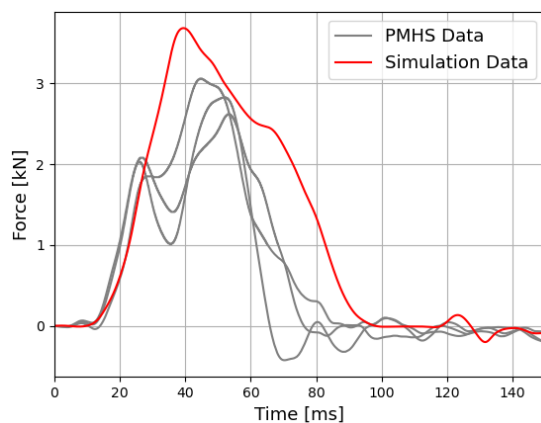

**G: Footrest forces in X-direction**

Correlation Method Score (CORA) : 0.793

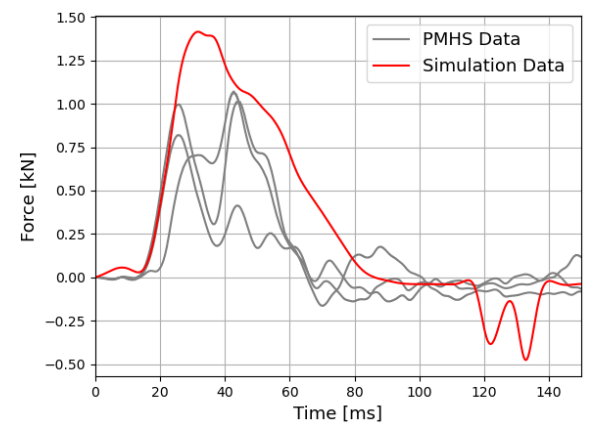

**H: Footrest forces in Z-direction**

Correlation Method Score (CORA) : 0.782
