# Supplementary material for: Effects of seat pan and pelvis angles on the occupant response in a reclined position during a frontal crash
Source: PLOS journal article supplement (doi:10.1371/journal.pone.0257292), 2021-09-20
Supplement: S5 (10.1371/journal.pone.0257292.s005) [file journal.pone.0257292.s005]

| Step (in chronological order)                                                                                                                                                                                        | Occupant posture |                  |                    |                   |
|----------------------------------------------------------------------------------------------------------------------------------------------------------------------------------------------------------------------|------------------|------------------|--------------------|-------------------|
|                                                                                                                                                                                                                      | Baseline         | Reclined Upright | Reclined Reference | Reclined Slouched |
| <b>HBM rotation</b><br><u>Method</u> : HBM model was rotated with the seatback<br><u>Fixed bones</u> : /                                                                                                             |                  | X                | X                  | X                 |
| <b>Adjust the pelvis angle</b><br><u>Method</u> : Changing the bone pelvic angle<br><u>Fixed bones</u> : Head, upper extremities, cervical and thorax vertebrae                                                      |                  | X                |                    | X                 |
| <b>Adjust the hip angle</b><br><u>Method</u> : Adjusting the hip angle until the thighs contacts the seat pan<br><u>Fixed bones</u> : Head, upper extremities, spine, pelvis                                         |                  | X                | X                  | X                 |
| <b>Adjust the knee angle</b><br><u>Method</u> : Adjusting the knee angle to 110°<br><u>Fixed bones</u> : Head, upper extremities, spine, pelvis, femurs                                                              |                  | X                | X                  | X                 |
| <b>Adjust the ankle angle</b><br><u>Method</u> : Adjusting the foot angle until the feet contact the footrest<br><u>Fixed bones</u> : Head, upper extremities, spine, pelvis, femurs, tibia                          |                  | X                | X                  | X                 |
| <b>Lower the upper extremities (avoid initial penetration with the airbag)</b><br><u>Method</u> : Changing the humerus and then the radius angles<br><u>Fixed bones</u> : Head, spine, pelvis, and lower extremities | X                | X                | X                  | X                 |
| Model subjected to gravity on the semi-rigid seat                                                                                                                                                                    | X                | X                | X                  | X                 |
